# Supplementary material for: Agriculturally Improved and Semi-Natural Permanent Grasslands Provide Complementary Ecosystem Services in Swedish Boreal Landscapes
Source: MDPI journal article supplement (doi:10.3390/agronomy14030567), 2024-03-12
Supplement: s1 [file s1]

Table S1: Species list and red-list status for each grassland type ordered by number of sample plot observed.

| Grassland Type     | Scientific name                                          | Total number of samples | Red list status |
|--------------------|----------------------------------------------------------|-------------------------|-----------------|
| <i>Improved PG</i> | <i>Vicia cracca</i>                                      | 181                     |                 |
|                    | <i>Stellaria graminea</i>                                | 169                     |                 |
|                    | <i>Festuca rubra</i>                                     | 165                     |                 |
|                    | <i>Trifolium pratense</i>                                | 136                     |                 |
|                    | <i>Plantago lanceolata</i>                               | 98                      |                 |
|                    | <i>Galium verum</i>                                      | 79                      |                 |
|                    | <i>Luzula</i>                                            | 62                      |                 |
|                    | <i>Anthoxanthum odoratum</i>                             | 62                      |                 |
|                    | <i>Achillea ptarmica</i>                                 | 51                      |                 |
|                    | <i>Potentilla erecta</i>                                 | 47                      |                 |
|                    | <i>Festuca ovina</i>                                     | 45                      |                 |
|                    | <i>Viola canina/V. riviniana</i>                         | 38                      |                 |
|                    | <i>Campanula rotundifolia</i> subsp. <i>rotundifolia</i> | 36                      |                 |
|                    | <i>Hypericum perforatum</i>                              | 29                      | EN              |
|                    | <i>Pilosella officinarum</i>                             | 29                      |                 |
|                    | <i>Lotus corniculatus</i>                                | 29                      |                 |
|                    | <i>Galium boreale</i>                                    | 26                      |                 |
|                    | <i>Potentilla crantzii/P. verna</i>                      | 24                      |                 |
|                    | <i>Rumex acetosella</i>                                  | 23                      |                 |
|                    | <i>Leucanthemum vulgare</i>                              | 22                      |                 |
|                    | <i>Filipendula vulgaris</i>                              | 21                      |                 |
|                    | <i>Knautia arvensis</i>                                  | 21                      |                 |
|                    | <i>Medicago lupulina</i>                                 | 20                      |                 |
|                    | <i>Rhinanthus</i> Sp.                                    | 20                      |                 |
|                    | <i>Ranunculus bulbosus</i>                               | 17                      |                 |
|                    | <i>Briza media</i>                                       | 16                      |                 |
|                    | <i>Pimpinella saxifraga</i>                              | 15                      |                 |
|                    | <i>Avenula pubescens</i>                                 | 14                      |                 |
|                    | <i>Euphrasia</i> spp                                     | 14                      |                 |
|                    | <i>Avenula pratensis</i>                                 | 12                      |                 |
|                    | <i>Sesleria uliginosa</i>                                | 11                      |                 |
|                    | <i>Primula veris</i>                                     | 8                       |                 |
|                    | <i>Nardus stricta</i>                                    | 7                       |                 |
|                    | <i>Rubus arcticus</i>                                    | 7                       |                 |
|                    | <i>Danthonia decumbens</i>                               | 6                       |                 |
|                    | <i>Bistorta vivipara</i>                                 | 6                       |                 |
|                    | <i>Linum catharticum</i>                                 | 6                       |                 |
|                    | <i>Arenaria serpyllifolia</i>                            | 5                       |                 |
|                    | <i>Thymus serpyllum</i>                                  | 5                       | NT              |
|                    | <i>Cirsium acaule</i>                                    | 5                       | NT              |

|                    |                                                          |    |    |
|--------------------|----------------------------------------------------------|----|----|
|                    | <i>Sedum acre</i>                                        | 4  |    |
|                    | <i>Trifolium arvense</i>                                 | 3  |    |
|                    | <i>Arabis hirsuta</i> var. <i>hirsuta</i> /glaberrima    | 3  |    |
|                    | <i>Plantago media</i>                                    | 3  |    |
|                    | <i>Carex flacca</i>                                      | 3  |    |
|                    | <i>Viscaria vulgaris</i>                                 | 3  |    |
|                    | <i>Veronica spicata</i>                                  | 3  | NT |
|                    | <i>Helianthemum nummularium</i>                          | 3  | NT |
|                    | <i>Leontodon hispidus</i>                                | 3  | NT |
|                    | <i>Veronica arvensis</i> /V. <i>verna</i>                | 2  |    |
|                    | <i>Dactylorhiza maculata</i> subsp. <i>maculata</i>      | 2  |    |
|                    | <i>Pilosella lactucella</i>                              | 2  |    |
|                    | <i>Polygala amarella</i>                                 | 2  |    |
|                    | <i>Vincetoxicum hirundinaria</i>                         | 2  |    |
|                    | <i>Phleum phleoides</i>                                  | 2  | NT |
|                    | <i>Dactylorhiza sambucina</i>                            | 1  |    |
|                    | <i>Dianthus deltoides</i>                                | 1  |    |
|                    | <i>Gymnadenia conopsea</i>                               | 1  |    |
|                    | <i>Viola hirta</i>                                       | 1  |    |
|                    | <i>Artemisia campestris</i>                              | 1  |    |
|                    | <i>Asperula tinctoria</i>                                | 1  |    |
|                    | <i>Polygala vulgaris</i>                                 | 1  |    |
|                    | <i>Sedum sexangulare</i>                                 | 1  |    |
|                    | <i>Prunella grandiflora</i>                              | 1  |    |
|                    | <i>Sedum rupestre</i>                                    | 1  |    |
|                    | <i>Armeria maritima</i>                                  | 1  |    |
|                    | <i>Crepis praemorsa</i>                                  | 1  | NT |
|                    | <i>Scorzonera humilis</i>                                | 1  | NT |
| <b>Improved TG</b> | <i>Trifolium pratense</i>                                | 84 |    |
|                    | <i>Vicia cracca</i>                                      | 71 |    |
|                    | <i>Festuca rubra</i>                                     | 42 |    |
|                    | <i>Stellaria graminea</i>                                | 35 |    |
|                    | <i>Achillea ptarmica</i>                                 | 28 |    |
|                    | <i>Plantago lanceolata</i>                               | 22 |    |
|                    | <i>Rumex acetosella</i>                                  | 13 |    |
|                    | <i>Anthoxanthum odoratum</i>                             | 12 |    |
|                    | <i>Potentilla erecta</i>                                 | 11 |    |
|                    | <i>Campanula rotundifolia</i> subsp. <i>rotundifolia</i> | 8  |    |
|                    | <i>Leucanthemum vulgare</i>                              | 8  |    |
|                    | <i>Viola canina</i> /V. <i>riviniana</i>                 | 8  |    |
|                    | <i>Galium verum</i>                                      | 7  |    |
|                    | <i>Luzula</i>                                            | 7  |    |
|                    | <i>Galium boreale</i>                                    | 7  |    |
|                    | <i>Knautia arvensis</i>                                  | 6  |    |

|                        |                                                             |     |    |
|------------------------|-------------------------------------------------------------|-----|----|
|                        | <i>Euphrasia spp</i>                                        | 6   |    |
|                        | <i>Hypericum perforatum</i>                                 | 5   | EN |
|                        | <i>Festuca ovina</i>                                        | 5   |    |
|                        | <i>Lotus corniculatus</i>                                   | 5   |    |
|                        | <i>Filipendula vulgaris</i>                                 | 4   |    |
|                        | <i>Potentilla crantzii/P. verna</i>                         | 4   |    |
|                        | <i>Medicago lupulina</i>                                    | 3   |    |
|                        |                                                             | 3   |    |
|                        | <i>Pimpinella saxifraga</i>                                 | 2   |    |
|                        | <i>Pilosella officinarum</i>                                | 2   |    |
|                        | <i>Ranunculus bulbosus</i>                                  | 2   |    |
|                        | <i>Avenula pubescens</i>                                    | 2   |    |
|                        | <i>Briza media</i>                                          | 1   |    |
|                        | <i>Primula veris</i>                                        | 1   |    |
|                        | <i>Polygala vulgaris</i>                                    | 1   |    |
|                        | <i>Danthonia decumbens</i>                                  | 1   |    |
|                        | <i>Bistorta vivipara</i>                                    | 1   |    |
|                        | <i>Pilosella lactucella</i>                                 | 1   |    |
|                        | <i>Plantago media</i>                                       | 1   |    |
|                        | <i>Arenaria serpyllifolia</i>                               | 1   |    |
|                        | <i>Linum catharticum</i>                                    | 1   |    |
|                        | <i>Sesleria uliginosa</i>                                   | 1   |    |
|                        | <i>Avenula pratensis</i>                                    | 1   |    |
|                        | <i>Trifolium montanum</i>                                   | 1   | NT |
|                        | <i>Thymus serpyllum</i>                                     | 1   | NT |
|                        | <i>Helianthemum nummularium</i>                             | 1   | NT |
| <b>Semi-natural PG</b> | <i>Festuca rubra</i>                                        | 227 |    |
|                        | <i>Stellaria graminea</i>                                   | 174 |    |
|                        | <i>Vicia cracca</i>                                         | 168 |    |
|                        | <i>Galium verum</i>                                         | 138 |    |
|                        | <i>Trifolium pratense</i>                                   | 126 |    |
|                        | <i>Festuca ovina</i>                                        | 107 |    |
|                        | <i>Galium boreale</i>                                       | 103 |    |
|                        | <i>Campanula rotundifolia</i> subsp.<br><i>rotundifolia</i> | 101 |    |
|                        | <i>Viola canina/V. riviniana</i>                            | 100 |    |
|                        | <i>Potentilla erecta</i>                                    | 96  |    |
|                        | <i>Plantago lanceolata</i>                                  | 94  |    |
|                        | <i>Anthoxanthum odoratum</i>                                | 70  |    |
|                        | <i>Luzula</i>                                               | 65  |    |
|                        | <i>Pilosella officinarum</i>                                | 57  |    |
|                        | <i>Leucanthemum vulgare</i>                                 | 53  |    |
|                        | <i>Pimpinella saxifraga</i>                                 | 43  |    |
|                        | <i>Filipendula vulgaris</i>                                 | 43  |    |
|                        | <i>Achillea ptarmica</i>                                    | 39  |    |

|  |                                     |    |    |
|--|-------------------------------------|----|----|
|  | <i>Hypericum perforatum</i>         | 36 | EN |
|  | <i>Knautia arvensis</i>             | 35 |    |
|  | <i>Primula veris</i>                | 28 |    |
|  | <i>Avenula pratensis</i>            | 28 |    |
|  | <i>Rumex acetosella</i>             | 27 |    |
|  | <i>Potentilla crantzii/P. verna</i> | 26 |    |
|  | <i>Lotus corniculatus</i>           | 24 |    |
|  | <i>Avenula pubescens</i>            | 22 |    |
|  | <i>Sesleria uliginosa</i>           | 21 |    |
|  | <i>Briza media</i>                  | 20 |    |
|  | <i>Rubus arcticus</i>               | 15 |    |
|  |                                     | 12 |    |
|  | <i>Pilosella lactucella</i>         | 11 |    |
|  | <i>Medicago lupulina</i>            | 10 |    |
|  | <i>Danthonia decumbens</i>          | 10 |    |
|  | <i>Vincetoxicum hirundinaria</i>    | 10 |    |
|  | <i>Thymus serpyllum</i>             | 10 | NT |
|  | <i>Trifolium arvense</i>            | 9  |    |
|  | <i>Ranunculus bulbosus</i>          | 9  |    |
|  | <i>Euphrasia spp</i>                | 8  |    |
|  | <i>Helianthemum nummularium</i>     | 8  | NT |
|  | <i>Sedum acre</i>                   | 7  |    |
|  | <i>Linum catharticum</i>            | 7  |    |
|  | <i>Veronica arvensis/V. verna</i>   | 6  |    |
|  | <i>Bistorta vivipara</i>            | 6  |    |
|  | <i>Anthyllis vulneraria</i>         | 5  |    |
|  | <i>Carex flacca</i>                 | 5  |    |
|  | <i>Viola hirta</i>                  | 4  |    |
|  | <i>Polygala vulgaris</i>            | 4  |    |
|  | <i>Scorzonera humilis</i>           | 4  | NT |
|  | <i>Plantago media</i>               | 3  |    |
|  | <i>Nardus stricta</i>               | 3  |    |
|  | <i>Viscaria vulgaris</i>            | 3  |    |
|  | <i>Veronica spicata</i>             | 3  | NT |
|  | <i>Dianthus deltoides</i>           | 2  |    |
|  | <i>Sedum rupestre</i>               | 2  |    |
|  | <i>Dactylorhiza sambucina</i>       | 1  |    |
|  | <i>Artemisia campestris</i>         | 1  |    |
|  | <i>Asperula tinctoria</i>           | 1  |    |
|  | <i>Melica ciliata</i>               | 1  |    |
|  | <i>Sedum sexangulare</i>            | 1  |    |
|  | <i>Antennaria dioica</i>            | 1  |    |
|  | <i>Sedum annuum</i>                 | 1  |    |
|  | <i>Arenaria serpyllifolia</i>       | 1  |    |
|  | <i>Carlina vulgaris</i>             | 1  |    |

|                                       |                                                          |    |    |
|---------------------------------------|----------------------------------------------------------|----|----|
|                                       | <i>Trifolium montanum</i>                                | 1  | NT |
|                                       | <i>Cirsium acaule</i>                                    | 1  | NT |
|                                       | <i>Crepis praemorsa</i>                                  | 1  | NT |
|                                       | <i>Hypochaeris maculata</i>                              | 1  | NT |
|                                       | <i>Leontodon hispidus</i>                                | 1  | NT |
| <b>Semi-natural PG Special-values</b> | <i>Plantago lanceolata</i>                               | 83 |    |
|                                       | <i>Festuca ovina</i>                                     | 74 |    |
|                                       | <i>Galium verum</i>                                      | 67 |    |
|                                       | <i>Festuca rubra</i>                                     | 64 |    |
|                                       | <i>Trifolium pratense</i>                                | 60 |    |
|                                       | <i>Stellaria graminea</i>                                | 59 |    |
|                                       | <i>Vicia cracca</i>                                      | 53 |    |
|                                       | <i>Potentilla erecta</i>                                 | 52 |    |
|                                       | <i>Anthoxanthum odoratum</i>                             | 49 |    |
|                                       | <i>Galium boreale</i>                                    | 47 |    |
|                                       | <i>Viola canina/V. riviniana</i>                         | 42 |    |
|                                       | <i>Pilosella officinarum</i>                             | 41 |    |
|                                       | <i>Luzula</i>                                            | 41 |    |
|                                       | <i>Filipendula vulgaris</i>                              | 40 |    |
|                                       | <i>Campanula rotundifolia</i> subsp. <i>rotundifolia</i> | 33 |    |
|                                       | <i>Sesleria uliginosa</i>                                | 31 |    |
|                                       | <i>Lotus corniculatus</i>                                | 30 |    |
|                                       | <i>Briza media</i>                                       | 26 |    |
|                                       | <i>Hypericum perforatum</i>                              | 24 | EN |
|                                       | <i>Leucanthemum vulgare</i>                              | 22 |    |
|                                       | <i>Pimpinella saxifraga</i>                              | 18 |    |
|                                       | <i>Danthonia decumbens</i>                               | 17 |    |
|                                       | <i>Knautia arvensis</i>                                  | 16 |    |
|                                       | <i>Carex flacca</i>                                      | 15 |    |
|                                       | <i>Potentilla crantzii/P. verna</i>                      | 15 |    |
|                                       | <i>Linum catharticum</i>                                 | 13 |    |
|                                       | <i>Cirsium acaule</i>                                    | 13 | NT |
|                                       | <i>Rumex acetosella</i>                                  | 12 |    |
|                                       | <i>Primula veris</i>                                     | 12 |    |
|                                       | <i>Medicago lupulina</i>                                 | 12 |    |
|                                       | <i>Avenula pratensis</i>                                 | 12 |    |
|                                       | <i>Helianthemum nummularium</i>                          | 12 | NT |
|                                       | <i>Prunella grandiflora</i>                              | 11 |    |
|                                       | <i>Thymus serpyllum</i>                                  | 11 | NT |
|                                       | <i>Ranunculus bulbosus</i>                               | 10 |    |
|                                       | <i>Avenula pubescens</i>                                 | 10 |    |
|                                       | <i>Veronica spicata</i>                                  | 10 | NT |
|                                       | <i>Anthyllis vulneraria</i>                              | 8  |    |

|  |                                                       |   |    |
|--|-------------------------------------------------------|---|----|
|  | <i>Nardus stricta</i>                                 | 7 |    |
|  |                                                       | 7 |    |
|  | <i>Sedum acre</i>                                     | 6 |    |
|  | <i>Trifolium arvense</i>                              | 6 |    |
|  | <i>Achillea ptarmica</i>                              | 6 |    |
|  | <i>Arabis hirsuta</i> var. <i>hirsuta</i> /glaberrima | 5 |    |
|  | <i>Sedum rupestre</i>                                 | 5 |    |
|  | <i>Rubus arcticus</i>                                 | 5 |    |
|  | <i>Clinopodium acinos</i>                             | 4 |    |
|  | <i>Polygala vulgaris</i>                              | 4 |    |
|  | <i>Sagina nodosa</i>                                  | 4 |    |
|  | <i>Plantago media</i>                                 | 4 |    |
|  | <i>Carlina vulgaris</i>                               | 4 |    |
|  | <i>Euphrasia</i> spp                                  | 4 |    |
|  | <i>Scorzonera humilis</i>                             | 4 | NT |
|  | <i>Dianthus deltoides</i>                             | 3 |    |
|  | <i>Viola hirta</i>                                    | 3 |    |
|  | <i>Veronica arvensis</i> /V. <i>verna</i>             | 3 |    |
|  | <i>Artemisia campestris</i>                           | 3 |    |
|  | <i>Asperula tinctoria</i>                             | 3 |    |
|  | <i>Pilosella lactucella</i>                           | 3 |    |
|  | <i>Vincetoxicum hirundinaria</i>                      | 3 |    |
|  | <i>Trifolium montanum</i>                             | 3 | NT |
|  | <i>Gymnadenia conopsea</i>                            | 2 |    |
|  | <i>Bistorta vivipara</i>                              | 2 |    |
|  | <i>Arenaria serpyllifolia</i>                         | 2 |    |
|  | <i>Phleum phleoides</i>                               | 2 | NT |
|  | <i>Artemisia oelandica</i>                            | 1 |    |
|  | <i>Poa alpina</i>                                     | 1 |    |
|  | <i>Melica ciliata</i>                                 | 1 |    |
|  | <i>Dactylorhiza maculata</i> subsp. <i>maculata</i>   | 1 |    |
|  | <i>Artemisia rupestris</i>                            | 1 |    |
|  | <i>Viscaria vulgaris</i>                              | 1 |    |
|  | <i>Crepis praemorsa</i>                               | 1 | NT |
|  | <i>Hypochaeris maculata</i>                           | 1 | NT |
|  | <i>Leontodon hispidus</i>                             | 1 | NT |
|  | <i>Arnica montana</i>                                 | 1 | VU |
